# Supplementary material
Source: Research Square preprint supplement (doi:10.21203/rs.3.rs-9527688/v1)
Supplement: Supplementary file 1 [file 8c137f1ce1ae5e2acc4371f4.docx]

Argentinean wetlands through Time: a chronicle of 100 years of botanical history in Buenos Aires province

Wetlands journal

Elisei, A.M. 1,2,3* ([0009-0004-9078-6947](https://orcid.org/0009-0004-9078-6947)), Bena, M.J.4 (0000-0002-2184-9738),  Fischer, M.A3,5 (0009-0003-1125-5746), Fortunato, R H. 1,2,3,6 (0000-0002-1569-8849)

*Correspondence to: elisei.aldana@inta.gob.ar

1. CONICET
2. Instituto de Recursos biológicos CNIA - (INTA) Hurlingham, Buenos Aires, Argentina.
3. Universidad de Morón, Buenos Aires, Argentina.
4. Estación Experimental Agropecuaria Delta del Paraná (INTA). Campana, Buenos Aires, Argentina.
5. Instituto de Clima y Agua (INTA) Hurlingham, Buenos Aires, Argentina.
6. Instituto de Botánica Darwinion IBODA - CONICET – ANCEFN

# Supplementary material

**Tab. S1** Table of recorded species associated with Province of Buenos Aires wetlands. Ref: Region: Indicates which region it belongs to (1–5); Origin: E: Exotic, N: Native; Life cycle: A: annual, P: perennial; Growth habit: H: Herb, C: Creeper, P: Palm, Sh: Shrub, T: Tree.

| **Species** | **Region** | **Origin** | **Life cycle** | **Growth habit** |
| --- | --- | --- | --- | --- |
| Acacia longifolia (Andrews) Willd. | 3 | E | P | Sh |
| Acacia melanoxylon R.Br. | 1, 3, 5 | E | P | T |
| Acalypha communis Müll.Arg. | 5 | N | P | H |
| Acanthostyles buniifolius (Hook. & Arn.) | 5 | N | P | Sh |
| Acanthosyris spinescens (Mart. & Eichler) Griseb. | 5 | N | P | T |
| Achyrocline saturejoides (Lam.) DC. | 3,5 | N | P | Sh |
| Acicarpha procumbens Less. | 5 | N | P | H |
| Acicarpha tribuloides Juss. | 1, 5 | N | A | H |
| Acmella bellidioides (Sm.) R.K.Jansen | 1 | N | P | H |
| Acmella decumbens (Sm.) R.K. Jansen | 1, 3, 5 | N | P | H |
| Acmella pusilla (Hook. & Arn.) R.K.Jansen | 5 | N | P | H |
| Adenostemma brasilianum (Pers.) Cass. | 1, 5 | N | A | H |
| Adesmia bicolora (Poir.) DC. | 3, 5 | N | P | H |
| Adesmia incana Vogel | 1 | N | P | H |
| Adiantum capillus-veneris L. | 5 | E | P | H |
| Adiantum raddianum C.Presl | 1, 5 | N | P | H |
| Aeschynomene montevidensis Vogel | 1,5 | N | P | Sh |
| Aeschynomene rudis Benth. | 1 | N | P | Sh |
| Agalinis communis (Cham. & Schltdl.) D'Arcy | 1, 3, 5 | N | P | Sh |
| Agave americana L. | 1 | E | P | H |
| Agrostis gigantea Roth | 5 | E | P | H |
| Agrostis montevidensis Spreng. ex Nees | 3, 5 | N | P | H |
| Agrostis stolonifera L. | 3, 5 | E | P | H |
| Ailanthus altissima (Mill.) Swingle | 5 | E | P | T |
| Albizia julibrissin Durazz. | 1 | E | P | T |
| Aldama anchusifolia (DC.) E.E.Schill. & Panero | 1 | N | P | Sh |
| Allenrolfea patagonica (Moq.) Kuntze | 5 | N | P | Sh |
| Allium triquetrum L. | 1, 5 | E | P | H |
| Allophylus edulis (A.St.-Hil., A.Juss. & Cambess.) Radlk. | 1, 3, 5 | N | P | T |
| Aloysia gratissima (Gillies & Hook.) Tronc. | 1 | N | P | Sh |
| Aloysia polystachya (Griseb.) Moldenke | 4 | N | P | Sh |
| Alstroemeria psittacina Lehm. | 1, 5 | N | P | H |
| Alternanthera paronychioides A.St.-Hil. | 1, 5 | N | P | H |
| Alternanthera philoxeroides (Mart.) Griseb. | 1, 3, 5 | N | P | H |
| Alternanthera reineckii Briq. | 1 | N | A | H |
| Amaranthus crispus (Lesp. & Thévenau) A.Braun ex J.M.Coult. & S.Watson | 4 | N | A | H |
| Amaranthus muricatus (Gillies ex Moq.) Hieron. | 1 | N | P | H |
| Amaranthus viridis L. | 1, 5 | N | P | H |
| Ambrosia scabra Hook. & Arn. | 1, 5 | N | P | H |
| Ambrosia tenuifolia Spreng. | 1, 3, 4, 5 | N | P | H |
| Amelichloa caudata (Trin.) Arriaga & Barkworth | 5 | N | P | H |
| Ammi majus L. | 3 | E | A | H |
| Amorpha fruticosa L. | 1, 5 | E | P | Sh |
| Anchietea pyrifolia (Mart.) G.Don | 1 | N | P | Sh |
| Anoda cristata (L.) Schltdl. | 1,4 | N | P | H |
| Anthemis cotula L. | 3, 5 | E | A | H |
| Apium sellowianum H.Wolff | 1, 2, 5 | N | A | H |
| Aquarius grandiflorus (Cham. & Schltdl.) Christenh. & Byng | 1, 5 | N | P | H |
| Aquarius longiscapus (Arechav.) Christenh. & Byng | 1 | N | P | H |
| Araujia angustifolia (Hook. & Arn.) Steud. | 1, 3, 5 | N | P | C |
| Araujia brachystephana (Griseb.) Fontella & Goyder | 1 | N | P | C |
| Araujia megapotamica (Spreng.) G.Don | 5 | N | P | C |
| Araujia odorata (Hook. & Arn.) Fontella & Goyder | 1, 5 | N | P | C |
| Araujia sericifera Brot. | 1, 3, 4, 5 | N | P | C |
| Archibaccharis vulneraria (Baker) Heering ex Malag. | 3, 5 | N | P | Sh |
| Arctium minus (Hill) Bernh. | 3 | E | A | H |
| Aristida uruguayensis Henrard | 4 | N | P | H |
| Aristolochia fimbriata Cham. | 5 | N | P | H |
| Aristolochia trilobata L. | 1 | N | P | C |
| Arrhenatherum elatius (L.) P.Beauv. ex J.Presl & C.Presl | 5 | E | P | H |
| Artemisia annua L. | 1, 3, 5 | E | A | H |
| Artemisia verlotiorum Lamotte | 1, 5 | E | P | H |
| Arum italicum Mill. | 3, 5 | E | P | H |
| Arundo donax L. | 1, 3, 4, 5 | E | P | H |
| Asclepias curassavica L. | 1, 5 | E | P | H |
| Asclepias mellodora A.St.-Hil. | 1, 3, 5 | N | P | H |
| Asparagus aethiopicus L. | 5 | E | P | H |
| Asparagus asparagoides (L.) Druce | 1, 5 | E | A | H |
| Asparagus setaceus (Kunth) Jessop | 5 | E | P | H |
| Asplenium sellowianum (Hieron.) Hieron. | 5 | N | P | H |
| Atriplex lampa (Moq.) Gillies ex D.Dietr. | 5 | N | P | Sh |
| Atriplex pamparum Griseb. | 5 | N | P | H |
| Atriplex prostrata Boucher ex DC. | 4, 5 | E | A | H |
| Austroeupatorium inulifolium (Kunth) R.M.King & H.Rob. | 1, 3, 5 | N | P | Sh |
| Avena sterilis L. | 3 | E | A | H |
| Axonopus compressus (Sw.) P.Beauv. | 1 | N | P | H |
| Axonopus fissifolius (Raddi) Kuhlm. | 1 | N | P | H |
| Ayenia scabra (L.) Christenh. & Byng | 1 | N | P | Sh |
| Azolla filiculoides Lam. | 3, 5 | N | A | H |
| Baccharis artemisioides Hook. & Arn. | 4 | N | P | Sh |
| Baccharis articulata Pers. | 1, 3, 5 | N | P | Sh |
| Baccharis breviseta DC. | 1, 5 | N | P | Sh |
| Baccharis caprariifolia DC. | 1 | N | P | Sh |
| Baccharis coridifolia DC. | 4 | N | P | Sh |
| Baccharis crispa Spreng. | 5 | N | P | Sh |
| Baccharis dracunculifolia DC. | 1, 3, 5 | N | P | Sh |
| Baccharis genistifolia DC. | 3, 5 | N | P | Sh |
| Baccharis gilliesii A.Gray | 3, 4 | N | P | Sh |
| Baccharis glutinosa Pers. | 1, 3, 4, 5 | N | P | H |
| Baccharis juncea (Cass.) Desf. | 3, 4, 5 | N | P | H |
| Baccharis notosergila Griseb. | 1, 3, 5 | N | P | Sh |
| Baccharis phyteuma Heering | 1, 5 | N | P | Sh |
| Baccharis punctulata DC. | 1, 3, 5 | N | P | Sh |
| Baccharis sagittalis (Less.) DC. | 1 | N | P | Sh |
| Baccharis salicifolia (Ruiz & Pav.) Pers. | 1, 3, 4, 5 | N | P | Sh |
| Baccharis spicata (Lam.) Baill. | 1, 3, 5 | N | P | Sh |
| Baccharis stenophylla Ariza | 3, 4 | N | P | H |
| Baccharis trimera (Less.) DC. | 1, 3, 5 | N | P | Sh |
| Bacopa monnieri (L.) Wettst. | 1, 3, 4, 5 | N | A | H |
| Bassia scoparia (L.) A.J. Scott | 3 | E | A | H |
| Bauhinia forficata (Vogel) Fortunato & Wunderlin | 1, 3, 5 | N | P | T |
| Begonia cucullata Willd. | 1, 3, 5 | N | P | H |
| Berberis ruscifolia Lam. | 5 | N | P | Sh |
| Berroa gnaphalioides Beauverd | 3, 4, 5 | N | P | H |
| Bidens laevis (L.) Britton, Sterns & Poggenb. | 1, 3, 5 | N | P | H |
| Bidens pilosa L. | 1, 5 | N | A | H |
| Bidens subalternans DC. | 1, 5 | N | A | H |
| Bignonia callistegioides Cham. | 1, 5 | N | P | C |
| Blackstonia perfoliata (L.) Huds. | 5 | E | A | H |
| Blechnum auriculatum Cav. | 1 | N | P | H |
| Blepharocalyx salicifolius (Kunth) O.Berg | 1, 5 | N | P | T |
| Blumenbachia insignis Schrad. | 5 | N | A | H |
| Blumenbachia latifolia Cambess. | 1, 5 | N | A | H |
| Boerhavia diffusa L. | 1 | E | P | H |
| Bolboschoenus maritimus (L.) Palla | 5 | E | P | H |
| Bothriochloa laguroides (DC.) Herter | 1, 3, 5 | N | P | H |
| Bouchetia anomala (Miers) Britton & Rusby | 4 | N | P | H |
| Bouteloua megapotamica (Spreng.) Kuntze | 1 | N | P | H |
| Bowlesia incana Ruiz & Pav. | 1, 5 | N | A | H |
| Brachystele camporum (Lindl.) Schltr. | 5 | N | P | H |
| Brassavola tuberculata Hook. | 1 | N | P | H |
| Brassica rapa L. | 1, 5 | E | A | H |
| Bromus auleticus Trin. ex Nees | 5 | N | P | H |
| Bromus catharticus Vahl | 1, 3, 4, 5 | N | A | H |
| Bromus hordeaceus L. | 3, 5 | E | A | H |
| Bromus japonicus Houtt. | 3 | E | A | H |
| Bromus secalinus L. | 1 | E | A | H |
| Broussonetia papyrifera (L.) L'Hér. ex Vent. | 1, 3, 4, 5 | E | P | T |
| Brugmansia suaveolens (Humb. & Bonpl. ex Willd.) Sweet | 1 | E | P | Sh |
| Buddleja stachyoides Cham. & Schltdl. | 1 | N | P | Sh |
| Buddleja thyrsoides Lam. | 1, 3, 5 | N | P | Sh |
| Cabomba caroliniana A.Gray | 1 | N | P | H |
| Cakile maritima Scop. | 5 | E | A | H |
| Calibrachoa parviflora (Juss.) D'Arcy | 1, 3, 5 | N | A | H |
| Calliandra parvifolia (Hook. & Arn.) Speg. | 1 | N | P | Sh |
| Callianthe picta (Gillies ex Hook. & Arn.) Donnell | 3 | N | P | Sh |
| Callitriche concinna Lansdown & Hassemer | 1 | N | A | H |
| Callitriche deflexa A.Braun ex Hegelm. | 5 | N | A | H |
| Callitriche rimosa Fassett | 1 | N | A | H |
| Calycera crassifolia (Miers) Hicken | 3, 5 | N | P | H |
| Calyptocarpus brasiliensis (Nees & Mart.) B.L.Turner | 1, 5 | N | P | H |
| Calyptocarpus vialis Less. | 1 | E | P | H |
| Calystegia sepium (L.) R.Br. | 1, 3, 5 | E | P | C |
| Calystegia soldanella (L.) Roem. & Schult. | 5 | N | P | H |
| Campovassouria cruciata (Vell.) R.M.King & H.Rob. | 1 | N | P | Sh |
| Campuloclinium macrocephalum (Less.) DC. | 3 | N | P | H |
| Campuloclinium purpurascens (Baker) R.M.King & H.Rob. | 1 | N | P | H |
| Canavalia bonariensis Lindl. | 1, 5 | N | P | C |
| Canna glauca L. | 1, 3, 5 | N | P | H |
| Canna indica L. | 1, 3, 5 | N | P | H |
| Cantinoa mutabilis (Rich.) Harley & J.F.B.Pastore | 1, 3, 5 | N | P | H |
| Capsella bursa-pastoris (L.) Medik. | 1, 4 | E | A | H |
| Cardamine bonariensis Juss. ex Pers. | 5 | N | P | H |
| Cardamine chenopodiifolia Pers. | 5 | N | A | H |
| Cardamine hirsuta L. | 5 | E | A | H |
| Cardiospermum halicacabum L. | 1, 5 | N | A | C |
| Carduus acanthoides L. | 1, 3, 4, 5 | E | A | H |
| Carduus nutans L. | 3 | E | A | H |
| Carduus tenuiflorus Curtis | 3 | E | A | H |
| Carex bonariensis Desf. ex Poir. | 3 | N | P | H |
| Carex chilensis Brongn. | 1 | N | P | H |
| Carex divulsa Stokes | 5 | E | P | H |
| Carex polysticha Boeckeler | 3 | N | P | H |
| Carex sellowiana Schltdl. | 1 | N | P | H |
| Carex vixdentata (Kük.) G.A.Wheeler | 5 | N | P | H |
| Carpobrotus edulis (L.) N.E.Br. | 5 | E | A | H |
| Castilleja arvensis Schltdl. & Cham. | 1 | N | A | H |
| Cayaponia bonariensis (Mill.) Mart.Crov. | 1, 5 | N | P | C |
| Cayaponia martiana (Cogn.) Cogn. | 1 | N | P | C |
| Cayaponia podantha Cogn. | 1, 5 | N | P | C |
| Ceiba speciosa (A.St.-Hil., A.Juss. & Cambess.) Ravenna | 1 | N | P | T |
| Celtis iguanaea (Jacq.) Sarg. | 5 | N | P | T |
| Celtis pallida Torr. | 1 | N | P | Sh |
| Celtis tala Gillies ex Planch. | 1, 3, 5 | N | P | T |
| Cenchrus latifolius (Spreng.) Morrone | 1 | N | P | H |
| Cenchrus longisetus M.C.Johnst. | 3 | E | P | H |
| Cenchrus spinifex Cav. | 1, 5 | N | A | H |
| Centaurea calcitrapa L. | 3, 5 | E | A | H |
| Centaurea melitensis L. | 1 | E | A | H |
| Centaurea solstitialis L. | 3 | E | A | H |
| Centaurium littorale (Turner) Gilmour | 1 | E | A | H |
| Centaurium pulchellum (Sw.) Hayek ex Hand.-Mazz., Stadlm., Janch. & Faltis | 1, 3, 4, 5 | E | A | H |
| Cephalanthus glabratus (Spreng.) K.Schum. | 1, 3, 5 | N | P | Sh |
| Cerastium glomeratum Thuill. | 1 | E | A | H |
| Cerastium humifusum Cambess. | 3, 5 | N | P | H |
| Cerastium rivulariastrum Möschl & Pedersen | 5 | N | A | H |
| Ceratophyllum demersum L. | 5 | N | P | H |
| Cestrum euanthes Schltdl. | 1 | N | P | Sh |
| Cestrum parqui (Lam.) L'Hér. | 1, 3, 5 | N | P | Sh |
| Cestrum thyrsoideum Kunth | 5 | E | P | Sh |
| Chaetogastra nitida (Graham) P.J.F.Guim. & Michelang. | 1, 5 | N | P | H |
| Chaptalia arechavaletae Hieron. | 3, 5 | N | P | H |
| Chaptalia integerrima (Vell.) Burkart | 4 | N | P | H |
| Chaptalia nutans (L.) Pol. | 1, 3 | N | P | H |
| Chaptalia sinuata (Less.) Baker | 4 | N | P | H |
| Chascolytrum subaristatum (Lam.) Desv. | 1, 3, 4 | N | P | H |
| Chenopodiastrum murale (L.) S. Fuentes, Uotila & Borsch | 1 | E | A | H |
| Chevreulia acuminata Less. | 3 | N | P | H |
| Chloraea membranacea Lindl. | 1, 3, 5 | N | P | H |
| Chloris halophila Parodi | 4 | N | P | H |
| Chondrilla juncea L. | 3 | E | P | H |
| Chromolaena laevigata (Lam.) R.M.King & H.Rob. | 1 | N | P | Sh |
| Chromolaena odorata (L.) R.M.King & H.Rob. | 1 | N | P | Sh |
| Chrysolaena platensis (Spreng.) H.Rob. | 1 | N | P | Sh |
| Cichorium intybus L. | 1, 3, 4, 5 | E | A | H |
| Cinnagrostis viridiflavescens (Poir.) P.M. Peterson, Soreng, Romasch. & Barberá | 1, 3, 4 | N | P | H |
| Cirsium vulgare (Savi) Ten. | 1, 2, 3, 4, 5 | E | A | H |
| Cissampelos pareira L. | 1 | N | P | C |
| Cissus palmata Poir. | 1, 5 | N | P | C |
| Citharexylum montevidense (Spreng.) Moldenke | 1, 3, 5 | N | P | T |
| Citrullus colocynthis (L.) Schrad. | 1 | E | P | C |
| Clematicissus striata (Ruiz & Pav.) Lombardi | 5 | N | P | C |
| Clematis bonariensis Juss. ex DC. | 5 | N | P | C |
| Clematis campestris A.St.-Hil. | 1, 3, 5 | N | P | C |
| Cleome houtteana Schltdl. | 1, 3, 5 | N | A | H |
| Cleome titubans Speg. | 3, 5 | N | P | H |
| Clerodendrum bungei Steud. | 5 | E | P | Sh |
| Colletia paradoxa (Spreng.) Escal. | 3 | N | P | Sh |
| Colletia spinosissima J.F.Gmel. | 5 | N | P | Sh |
| Commelina diffusa Burm.f. | 1 | N | P | H |
| Commelina erecta L. | 1, 3, 5 | N | P | H |
| Condea floribunda (Briq.) Harley & JFBPastore | 5 | N | P | H |
| Conium maculatum L. | 3, 4, 5 | E | A | H |
| Convolvulus arvensis L. | 5 | E | P | C |
| Convolvulus crenatifolius Ruiz & Pav. | 3 | N | P | C |
| Convolvulus hermanniae L'Hér. | 1, 3 | N | P | C |
| Cortaderia selloana (Schult. & Schult.f.) Asch. & Graebn. | 1, 2, 3, 4, 5 | N | P | H |
| Cosmos bipinnatus Cav. | 1 | E | A | H |
| Cotula australis Hook.f. | 1 | E | A | H |
| Cotula coronopifolia L. | 1, 3, 5 | E | P | H |
| Crassula peduncularis (Sm.) Cambess. | 5 | N | A | H |
| Crepis setosa Haller f. | 1, 3, 5 | E | A | H |
| Cressa truxillensis Kunth | 1, 3 | N | P | H |
| Crotalaria micans Link | 1 | N | P | Sh |
| Ctenitis submarginalis (Langsd. & Fisch.) Ching | 5 | N | P | H |
| Cucurbita andreana Naudin | 3 | N | A | C |
| Cucurbita pepo L. | 1 | E | A | C |
| Cuphea fruticosa Spreng. | 1, 3, 5 | N | P | H |
| Cuphea glutinosa Cham. & Schltdl. | 1, 5 | N | P | H |
| Cuphea racemosa (L.f.) Spreng. | 1, 5 | N | P | H |
| Cuscuta cristata Engelm. | 5 | N | A | C |
| Cuscuta indecora Choisy | 4 | E | A | C |
| Cyclanthera hystrix (Gillies) Arn. | 1, 5 | N | A | C |
| Cyclolepis genistoides Gillies ex D.Don | 5 | N | P | Sh |
| Cyclopogon elatus (Sw.) Schltr. | 3, 5 | N | P | H |
| Cyclospermum leptophyllum (Pers.) Britton & P. Wilson | 4 | N | A | H |
| Cynara cardunculus L. | 1, 3, 5 | E | P | H |
| Cynodon dactylon (L.) Pers. | 1 | E | P | H |
| Cynodon incompletus Nees | 3 | E | P | H |
| Cypella herbertii (Lindl.) Herb. | 1, 3, 5 | N | P | H |
| Cyperus aggregatus (Willd.) Endl. | 4 | N | P | H |
| Cyperus articulatus L. | 1, 4 | N | P | H |
| Cyperus byssaceus Pereira-Silva | 1, 5 | N | P | H |
| Cyperus digitatus Roxb. | 5 | N | P | H |
| Cyperus eragrostis Lam. | 1, 3 | N | P | H |
| Cyperus fraternus Kunth | 3 | N | P | H |
| Cyperus giganteus Vahl | 1 | N | P | H |
| Cyperus imbricatus Retz. | 5 | N | P | H |
| Cyperus incomtus Kunth | 5 | N | P | H |
| Cyperus iria L. | 1 | E | A | H |
| Cyperus jaeggii Boeckeler | 3 | N | P | H |
| Cyperus melanostachyus Kunth | 3 | N | P | H |
| Cyperus odoratus L. | 5 | N | P | H |
| Cyperus papyrus L. | 1 | N | P | H |
| Cyperus pohlii (Nees) Steud. | 1 | N | P | H |
| Cyperus prolixus Kunth | 5 | N | P | H |
| Cyperus rigens J.Presl & C.Presl | 1 | N | P | H |
| Cyperus trigynus Spreng. | 3, 5 | N | P | H |
| Cyperus virens Michx. | 1 | N | P | H |
| Cyrtocymura scorpioides (Lam.) H.Rob. | 1, 5 | N | P | Sh |
| Cyrtomium falcatum (L.f.) C.Presl | 1, 5 | E | P | H |
| Dactylis glomerata L. | 1, 3, 5 | E | P | H |
| Daphnopsis racemosa Griseb. | 1 | N | P | Sh |
| Datura ferox L. | 1, 5 | N | A | H |
| Datura stramonium L. | 3 | E | A | H |
| Daucus pusillus Michx. | 5 | N | A | H |
| Desmodium uncinatum (Jacq.) DC. | 5 | N | P | H |
| Dianthera laevilinguis (Nees) Lindau | 1, 5 | N | P | H |
| Dichanthelium sabulorum (Lam.) Gould & C.A.Clark | 5 | N | P | H |
| Dichondra repens J.R.Forst. & G.Forst. | 5 | E | P | H |
| Dicliptera squarrosa Nees | 1, 3, 5 | N | P | H |
| Digitaria aequiglumis (Hack. & Arechav.) Parodi | 1 | N | A | H |
| Dioscorea sinuata Vell. | 1, 5 | N | P | C |
| Diplachne fusca (L.) P.Beauv. ex Roem. & Schult. | 3 | N | P | H |
| Diplotaxis tenuifolia (L.) DC. | 3, 5 | E | P | H |
| Dipsacus fullonum L. | 1, 3, 4, 5 | E | P | H |
| Discaria americana Gillies & Hook. | 3, 5 | N | P | Sh |
| Distichlis scoparia (Kunth) Arechav. | 3, 4, 5 | N | P | H |
| Distichlis spicata (L.) Greene | 1, 3, 5 | N | P | H |
| Dolichandra unguis-cati (L.) L.G.Lohmann | 1, 5 | N | P | C |
| Duranta erecta L. | 1 | N | P | Sh |
| Dysphania ambrosioides (L.) Mosyakin & Clemants | 1 | N | P | H |
| Echinochloa crus-galli (L.) P.Beauv. | 1 | E | A | H |
| Echinochloa crus-pavonis (Kunth) Schult. | 3, 5 | N | A | H |
| Echinochloa helodes (Hack.) Parodi | 4 | N | P | H |
| Echinochloa polystachya (Kunth) Hitchc. | 1 | N | P | H |
| Echinopepon racemosus (Steud.) C.Jeffrey | 1 | N | A | C |
| Echinopsis oxygona (Link) Zucc. ex Pfeiff. & Otto | 3 | N | P | H |
| Echium plantagineum L. | 1, 3, 5 | E | A | H |
| Eclipta elliptica DC. | 5 | N | P | H |
| Eclipta megapotamica Sch.Bip. ex S.F.Blake | 1 | N | P | H |
| Eclipta prostrata (L.) L. | 1, 3, 5 | N | A | H |
| Eleocharis exigua (Kunth) Roem. & Schult. | 1 | N | P | H |
| Eleocharis montevidensis Kunth | 5 | N | P | H |
| Eleusine tristachya (Lam.) Lam. | 1, 3, 4, 5 | N | A | H |
| Elodea densa (Planch.) Casp. | 1 | N | P | H |
| Elymus scabrifolius (Döll) J.H.Hunz. | 5 | N | P | H |
| Elymus scabriglumis (Hack.) Á.Löve | 2 | N | P | H |
| Enterolobium contortisiliquum (Vell.) Morong | 1, 5 | N | P | T |
| Ephedra triandra Tul. | 1, 5 | N | P | Sh |
| Epilobium hirtigerum A.Cunn. | 1, 5 | N | P | H |
| Equisetum giganteum L. | 1, 2, 5 | N | P | H |
| Eragrostis bahiensis Schult. | 1, 5 | N | P | H |
| Eragrostis cilianensis (All.) Vignolo ex Janch. | 4 | E | A | H |
| Eragrostis lugens Nees | 4 | N | P | H |
| Eragrostis pilosa (L.) P.Beauv. | 1 | E | A | H |
| Eragrostis virescens J.Presl | 5 | N | A | H |
| Erechtites hieraciifolius (L.) Raf. ex DC. | 1 | E | A | H |
| Erianthus angustifolius Nees | 1 | N | P | H |
| Erigeron bonariensis L. | 1, 3, 4 | N | A | H |
| Erigeron floribundus (Kunth) Sch.Bip. | 5 | N | A | H |
| Erigeron laevigatus Rich. | 5 | N | A | H |
| Erigeron monorchis Griseb. | 4 | N | P | H |
| Erigeron primulifolius (Lam.) Greuter | 1, 4 | N | P | H |
| Erodium malacoides (L.) L'Hér. | 1 | E | A | H |
| Eryngium chamissonis Urb. | 1, 5 | N | P | H |
| Eryngium chubutense Neger ex Dusén | 1, 3 | N | A | H |
| Eryngium divaricatum Hook. & Arn. | 1 | N | P | H |
| Eryngium ebracteatum Lam. | 1, 3, 5 | N | P | H |
| Eryngium eburneum Decne. ex Hérincq | 1, 3, 5 | N | P | H |
| Eryngium echinatum Urb. | 1 | N | P | H |
| Eryngium elegans Cham. & Schltdl. | 1 | N | P | H |
| Eryngium horridum Malme | 1, 3, 5 | N | P | H |
| Eryngium mesopotamicum T.M.Pedersen | 1 | N | P | H |
| Eryngium nudicaule Lam. | 3 | N | P | H |
| Eryngium pandanifolium Cham. & Schltdl. | 1, 5 | N | P | H |
| Eryngium paniculatum Cav. & Dombey ex F.Delaroche | 1, 3, 5 | N | P | H |
| Eryngium serra Cham. & Schltdl. | 1, 5 | N | P | H |
| Erythrina crista-galli L. | 1, 3, 5 | N | P | T |
| Erythrostemon gilliesii (Hook.) Klotzsch | 1, 3 | N | P | Sh |
| Eugenia uniflora L. | 1 | N | P | T |
| Euphorbia hirtella Boiss. | 1, 5 | N | A | H |
| Euphorbia klotzschii Oudejans | 3, 5 | N | A | H |
| Euphorbia maculata L. | 1 | E | P | H |
| Euphorbia platyphyllos L. | 5 | E | A | H |
| Eustachys retusa (Lag.) Kunth | 4 | N | P | H |
| Evolvulus sericeus Sw. | 1 | N | P | H |
| Exhalimolobos weddellii (E.Fourn.) Al-Shehbaz & C.D.Bailey | 1 | N | A | H |
| Exostigma rivulare (Gardner) G.Sancho | 5 | N | P | H |
| Facelis retusa (Lam.) Sch.Bip. subsp. retusa | 3 | N | A | H |
| Fallopia convolvulus (L.) Á.Löve | 1, 3 | E | A | H |
| Festuca bromoides L. | 5 | E | A | H |
| Ficus luschnathiana (Miq.) Miq. | 1 | N | P | T |
| Flaveria bidentis (L.) Kuntze | 3 | N | A | H |
| Foeniculum vulgare Mill. | 1 | E | P | H |
| Frankenia juniperoides (Hieron.) M.N.Correa | 5 | N | P | Sh |
| Fumaria capreolata L. | 1, 3, 5 | E | A | H |
| Funastrum clausum (Jacq.) Schltr. | 1 | N | P | C |
| Funastrum flavum (Meyen) Malme | 1 | N | P | C |
| Gaillardia megapotamica Baker | 1, 3, 4 | N | P | H |
| Galega officinalis L. | 1, 3, 5 | E | P | H |
| Galianthe brasiliensis (Spreng.) E.L.Cabral & Bacigalupo | 1, 3, 5 | N | P | Sh |
| Galinsoga parviflora Cav. | 1, 5 | N | A | H |
| Galium aparine L. | 1, 4 | E | A | H |
| Galium bigeminum Griseb. | 5 | N | A | H |
| Galium hypocarpium (L.) Endl. ex Griseb. | 5 | N | P | H |
| Galium latoramosum Clos | 5 | N | P | H |
| Galium palustre L. | 5 | E | P | H |
| Galium vile (Cham. & Schltdl.) Dempster | 5 | N | A | H |
| Gamochaeta americana (Mill.) Wedd | 1, 3, 4 | N | P | H |
| Geoffroea decorticans (Gillies ex Hook. & Arn.) Burkart | 1, 3 | N | P | T |
| Geranium albicans A.St.-Hil. | 3 | N | P | H |
| Geranium molle L. | 1 | E | A | H |
| Geranium pusillum L. | 5 | E | A | H |
| Glandularia dissecta (Willd.) Schnack & Covas | 1 | N | P | H |
| Glandularia guaranitica Tronc. | 1 | N | P | H |
| Glandularia megapotamica (Spreng.) Cabrera & G. Dawson | 1, 5 | N | P | Sh |
| Glandularia peruviana (L.) Small | 1, 3, 4, 5 | N | P | H |
| Glandularia platensis (Spreng.) Schnack & Covas | 4 | N | P | H |
| Glandularia tenera (Spreng.) Cabrera | 1, 3, 4 | N | P | H |
| Glandularia tweedieana (Niven ex Hook.) P. Peralta | 1 | N | P | H |
| Gleditsia triacanthos L. | 1, 3, 4, 5 | E | P | T |
| Glyceria multiflora Steud. | 3 | N | P | H |
| Gomesa bifolia (Sims) M.W.Chase & N.H.Williams | 1, 3, 5 | N | P | H |
| Gomphrena elegans Mart. | 1, 5 | N | P | H |
| Gomphrena martiana Gillies ex Moq. | 4 | N | A | H |
| Gomphrena perennis L. | 1 | N | P | H |
| Gomphrena pulchella Mart. | 1 | N | P | H |
| Grahamia bracteata Gillies ex Hook. & Arn. | 5 | N | P | Sh |
| Grevillea robusta A.Cunn. ex R.Br. | 1, 3 | E | P | T |
| Grindelia aegialitis Cabrera | 5 | N | P | Sh |
| Grindelia pulchella Dunal | 1, 3, 5 | N | P | Sh |
| Grindelia scorzonerifolia Hook. & Arn. | 1 | N | P | Sh |
| Guadua trinii (Nees) Rupr. | 1, 5 | N | P | H |
| Gymnocoronis spilanthoides DC. | 1, 3, 5 | N | P | H |
| Gyptis tanacetifolia (Gillies ex Hook. & Arn.) D.J.N.Hind & Flann | 5 | N | P | Sh |
| Habenaria bractescens Lindl. | 1 | N | P | H |
| Habenaria gourlieana Gillies ex Lindl. | 5 | N | P | H |
| Halerpestes cymbalaria (Pursh) Greene | 3, 5 | N | P | H |
| Hedera helix L. | 1, 5 | E | P | C |
| Hedychium coronarium J.Koenig | 1, 5 | E | P | H |
| Heimia salicifolia Link | 3, 5 | N | P | Sh |
| Helenium uniflorum (Spreng.) P.L.R.Moraes | 1 | N | P | H |
| Helianthus tuberosus L. | 1, 5 | E | P | H |
| Heliotropium amplexicaule Vah | 3, 5 | N | P | H |
| Heliotropium curassavicum L. | 1, 3, 4, 5 | N | A | H |
| Heliotropium nicotianifolium Poir. | 5 | N | P | Sh |
| Helminthotheca echioides (L.) Holub | 3, 5 | E | A | H |
| Hemarthria altissima (Poir.) Stapf & C.E.Hubb. | 1 | E | P | H |
| Herbertia lahue (Molina) Goldblatt | 1, 3, 5 | N | P | H |
| Heterotheca subaxillaris (Lam.) Britton & Rusby | 4 | E | A | H |
| Hibiscus striatus Cav. | 1,5 | N | P | Sh |
| Hirschfeldia incana (L.) Lagr.-Foss. | 5 | E | A | H |
| Holcus lanatus L. | 5 | E | A | H |
| Holocheilus hieracioides (D.Don) Cabrera | 1 | N | P | H |
| Hordeum flexuosum Nees ex Steu | 3, 5 | N | P | H |
| Hordeum jubatum L. | 3, 5 | E | P | H |
| Hordeum murinum L. | 5 | E | A | H |
| Hordeum stenostachys Godr. | 3, 4, 5 | N | P | H |
| Hyalis argentea D.Don ex Hook. & Arn. | 5 | N | P | Sh |
| Hydrocharis laevigata (Humb. & Bonpl. ex Willd.) Byng & Christenh. | 1, 5 | N | P | H |
| Hydrocotyle bonariensis Comm. ex Lam. | 1, 3, 4, 5 | N | P | H |
| Hydrocotyle leucocephala Cham. & Schltdl. | 1, 5 | N | P | H |
| Hydrocotyle modesta Cham. & Schltdl. | 3, 5 | N | P | H |
| Hydrocotyle ranunculoides L.f. | 1, 3, 5 | N | P | H |
| Hygrophila costata Nees | 1 | N | P | H |
| Hymenachne grumosa (Nees) Zuloaga | 1, 5 | N | P | H |
| Hymenoxys anthemoides Cass. | 1, 4, 5 | N | A | H |
| Hymenoxys cabrerae K.F.Parker | 3 | N | A | H |
| Hypericum carinatum Griseb. | 1 | N | P | H |
| Hypericum mutilum L. | 1 | E | P | H |
| Hypochaeris albiflora (Kuntze) Azevêdo-Gonç. & Matzenb. | 5 | N | P | H |
| Hypochaeris chillensis (Kunth) Britton | 1, 5 | N | P | H |
| Hypochaeris megapotamica Cabrera | 1 | N | P | H |
| Hypochaeris microcephala (Sch.Bip.) Cabrera | 1, 5 | N | P | H |
| Hypochaeris petiolaris (Hook. & Arn.) Griseb. | 3 | N | P | H |
| Hypochaeris radicata L. | 3, 5 | E | P | H |
| Hypochaeris variegata (Lam.) Baker | 5 | N | P | H |
| Hypoxis decumbens L. | 1, 5 | N | P | H |
| Hyptis lorentziana O.Hoffm. | 5 | N | A | H |
| Ibicella lutea (Lindl.) Van Eselt. | 1, 3, 5 | N | A | H |
| Inga affinis DC. | 1 | N | P | T |
| Inga uraguensis Hook. & Arn. | 1 | N | P | T |
| Ipheion uniflorum (Graham) Raf. | 5 | N | P | H |
| Ipomoea alba L. | 1, 5 | N | P | C |
| Ipomoea cairica (L.) Sweet | 1, 3, 5 | E | P | C |
| Ipomoea grandifolia (Dammer) O'Donell | 1, 3 | N | A | C |
| Ipomoea indica (Burm.) Merr. | 1, 5 | N | P | C |
| Ipomoea indivisa (Vell.) Hallier f. | 1 | N | A | C |
| Ipomoea platensis Ker Gawl. | 1, 5 | N | P | C |
| Ipomoea purpurea (L.) Roth | 1, 5 | N | A | C |
| Ipomoea rubriflora O'Donell | 5 | N | A | C |
| Iresine diffusa Humb. & Bonpl. ex Willd. | 1,5 | N | P | Sh |
| Iris orientalis Mill. | 5 | E | P | H |
| Iris pseudacorus L. | 1, 3, 5 | E | P | H |
| Isolepis cernua (Vahl) Roem. & Schult. | 3 | N | A | H |
| Jaborosa integrifolia Lam. | 1, 5 | N | P | H |
| Jaborosa runcinata Lam. | 1, 3 | N | P | H |
| Jaegeria hirta (Lag.) Less. | 3, 5 | N | A | H |
| Jarava filifolia (Nees) Ciald. | 3 | N | P | H |
| Jarava plumosa (Spreng.) S.W.L.Jacobs & J.Everett | 3, 5 | N | P | H |
| Jaumea linearifolia DC. | 5 | N | P | H |
| Jodina rhombifolia (Hook. & Arn.) Reissek | 1, 5 | N | P | T |
| Juncus acutus L. | 1, 3, 5 | N | P | H |
| Juncus bufonius L. | 5 | N | A | H |
| Juncus microcephalus Kunth | 1, 5 | N | P | H |
| Junellia connatibracteata (Kuntze) Moldenke | 2 | N | P | Sh |
| Labatia salicifolia (Spreng.) Mart. | 1, 5 | N | P | T |
| Lactuca serriola L. | 3 | E | A | H |
| Lagenaria siceraria (Molina) Standl. | 3 | E | A | C |
| Lagurus ovatus L. | 3 | E | A | H |
| Lamium amplexicaule L. | 4 | E | A | H |
| Lamium purpureum L. | 5 | E | A | H |
| Lantana camara L. | 1 | N | P | Sh |
| Lantana grisebachii Stuck. ex Seckt | 1 | N | P | Sh |
| Lantana megapotamica (Spreng.) Tronc. | 1, 5 | N | P | Sh |
| Lantana montevidensis (Spreng.) Briq. | 1, 5 | N | P | Sh |
| Larrea divaricata Cav. | 5 | N | P | Sh |
| Lathyrus latifolius L. | 1 | E | P | C |
| Lathyrus nigrivalvis Burkart | 1 | N | A | H |
| Lathyrus paranensis Burkart | 1 | N | A | H |
| Lathyrus parodii Burkart | 1 | N | P | H |
| Lathyrus pubescens Hook. & Arn. | 5 | N | P | H |
| Leersia hexandra Sw. | 3, 5 | N | P | H |
| Lemna gibba L. | 3 | E | A | H |
| Leontodon saxatilis Lam. | 3, 5 | E | P | H |
| Leonurus japonicus Houtt. | 1 | E | A | H |
| Lepidium auriculatum Regel & Körn. | 1, 3, 5 | N | A | H |
| Lepidium didymum L. | 1 | N | A | H |
| Lepidium parodii Thell. | 1, 3, 5 | N | P | H |
| Lepismium lumbricoides (Lem.) Barthlott | 1, 5 | N | P | H |
| Leptospron adenanthum (G.Mey.) A.Delgado | 1, 5 | N | P | C |
| Lessingianthus rubricaulis (Bonpl.) H.Rob. | 3 | N | P | Sh |
| Leucanthemum vulgare Lam. | 1, 3 | E | P | H |
| Ligustrum lucidum W.T.Aiton | 1, 3, 5 | E | P | T |
| Ligustrum sinense Lour. | 1, 4, 5 | E | P | Sh |
| Lilaeopsis carolinensis J.M.Coult. & Rose | 1 | N | P | H |
| Lilaeopsis minor (A.W.Hill) Pérez-Mor. | 1 | N | P | H |
| Limonium brasiliense (Boiss.) Kuntze | 1, 5 | N | P | H |
| Linum usitatissimum L. | 3 | E | A | H |
| Lippia alba (Mill.) N.E.Br. ex Britton & P.Wilson | 1, 3, 5 | N | P | Sh |
| Lobelia hederacea Cham. | 1, 5 | N | P | H |
| Lobularia maritima (L.) Desv. | 5 | E | P | H |
| Lolium multiflorum Lam. | 3, 5 | E | A | H |
| Lolium perenne L. | 5 | E | P | H |
| Lombardochloa rufa (J. Presl) Roseng. & B.R. Arrill. | 1, 3 | N | P | H |
| Lonchocarpus nitidus (Vogel) Benth. | 1, 5 | N | P | T |
| Lonicera japonica Thunb. | 1, 3, 5 | E | P | C |
| Lotus corniculatus L. | 3 | E | P | H |
| Lotus tenuis Waldst. & Kit. ex Willd. | 3, 5 | E | P | H |
| Louisiella elephantipes (Nees ex Trin.) Zuloaga | 5 | N | P | H |
| Ludwigia bonariensis (Micheli) H.Hara | 1, 5 | N | P | H |
| Ludwigia grandiflora (Michx.) Greuter & Burdet | 3 | N | P | H |
| Ludwigia hexapetala (Hook. & Arn.) Zardini, H.Y.Gu & P.H.Raven | 1 | N | P | H |
| Ludwigia longifolia (DC.) H.Hara | 1 | N | A | H |
| Ludwigia octovalvis (Jacq.) P.H.Raven | 1 | N | P | H |
| Ludwigia peploides (Kunth) P.H.Raven | 1, 3, 4, 5 | N | P | H |
| Lupinus bracteolaris Desr. | 1 | N | A | H |
| Lupinus gibertianus C.P.Sm. | 1 | N | A | H |
| Lycianthes rantonnetii (Carrière) Bitter | 5 | N | P | Sh |
| Lycium boerhaviifolium L.f. | 1 | N | P | Sh |
| Lycium cestroides Schltdl. | 5 | N | P | Sh |
| Lycium chilense Bertero | 1, 5 | N | P | Sh |
| Lycium infaustum Miers | 1, 5 | N | P | Sh |
| Lysimachia arvensis (L.) U.Manns & Anderb. | 1, 3, 5 | E | A | H |
| Lysimachia minima (L.) U.Manns & Anderb. | 5 | E | A | H |
| Lythrum hyssopifolia L. | 1, 3 | E | A | H |
| Lythrum maritimum Kunth | 5 | N | P | H |
| Maclura pomifera (Raf.) C.K.Schneid. | 3, 5 | E | P | T |
| Malvastrum coromandelianum (L.) Garcke | 1, 5 | N | P | Sh |
| Malvella leprosa (Ortega) Krapov. | 1, 2, 3, 4, 5 | N | P | H |
| Manihot grahamii Hook. | 1, 3 | N | P | T |
| Margyricarpus pinnatus (Lam.) Kuntze | 5 | N | P | Sh |
| Marrubium vulgare L. | 1, 3, 5 | E | P | H |
| Matricaria chamomilla L. | 1, 3, 5 | E | A | H |
| Maytenus spinosa (Griseb.) Lourteig & O'Donell | 1 | N | P | Sh |
| Mecardonia procumbens (Mill.) Small | 1 | N | A | H |
| Medicago lupulina L. | 1, 3, 4, 5 | E | A | H |
| Medicago sativa L. | 3 | E | P | H |
| Megathyrsus maximus (Jacq.) B.K.Simon & S.W.L.Jacobs | 5 | E | P | H |
| Melia azedarach L. | 1, 4 | E | P | T |
| Melica argyrea Hack. | 1 | N | P | H |
| Melica brasiliana Ard. | 3 | N | P | H |
| Melica macra Nees | 1, 4, 5 | N | P | H |
| Melica rigida Cav. | 4, 5 | N | P | H |
| Melica sarmentosa Nees | 5 | N | P | H |
| Melilotus albus Medik. | 1, 3, 4, 5 | E | A | H |
| Melilotus indicus (L.) All. | 1, 3, 4, 5 | E | A | H |
| Melilotus officinalis (L.) Lam. | 3, 4 | E | A | H |
| Melissa officinalis L. | 1 | E | P | H |
| Menodora integrifolia (Cham. & Schltdl.) Steud. | 1 | N | P | Sh |
| Mentha pulegium L. | 3, 5 | E | P | H |
| Mesembryanthemum cordifolium L.f. | 1 | E | P | H |
| Microchilus platensis (Hauman) E.C.Smidt & M.W.Chase | 1 | N | P | H |
| Microgramma mortoniana de la Sota | 1, 5 | N | P | H |
| Microgramma squamulosa (Kaulf.) de la Sota | 1 | N | P | H |
| Microgramma vacciniifolia (Langsd. & Fisch.) Copel. | 1 | N | P | H |
| Microgyne trifurcata Less. | 4 | N | P | H |
| Micropsis dasycarpa (Griseb.) Beauverd | 1 | N | A | H |
| Mikania cordifolia (L.f.) Willd. | 1, 5 | N | P | C |
| Mikania micrantha Kunth | 1, 5 | N | P | C |
| Mikania parodii Cabrera | 3 | N | P | C |
| Mikania periplocifolia Hook. & Arn. | 1 | N | P | C |
| Mimosa bonplandii Benth. | 5 | N | P | Sh |
| Mimosa pigra L. | 1, 3, 5 | N | P | Sh |
| Mirabilis jalapa L. | 5 | E | P | H |
| Modiola caroliniana (L.) G.Don | 1, 3, 5 | N | P | H |
| Modiolastrum lateritium (Hook.) Krapov. | 5 | N | P | H |
| Modiolastrum malvifolium (Griseb.) K.Schum. | 1, 3, 5 | N | P | H |
| Momordica charantia L. | 1 | E | A | C |
| Monteiroa glomerata (Hook. & Arn.) Krapov. | 1, 5 | N | P | Sh |
| Morus alba L. | 1 | E | P | T |
| Muehlenbeckia sagittifolia (Ortega) Meisn. | 1, 3, 5 | N | P | Sh |
| Mutarda nigra (L.) Bernh. | 1 | E | A | H |
| Mutisia coccinea A.St.-Hil. | 5 | N | P | C |
| Myoporum laetum G.Forst. | 3, 5 | E | P | T |
| Myrceugenia glaucescens (Cambess.) D.Legrand & Kausel | 1, 5 | N | P | T |
| Myriophyllum aquaticum (Vell.) Verdc. | 1, 3, 5 | N | P | H |
| Myrsine laetevirens (Mez) Arechav. | 1, 3, 5 | N | P | T |
| Myrsine lorentziana (Mez) Arechav. | 1, 3, 5 | N | P | T |
| Nassella formicarum (Delile) Barkworth | 5 | N | P | H |
| Nassella hyalina (Nees) Barkworth | 1, 5 | N | P | H |
| Nassella longiglumis (Phil.) Barkworth | 5 | N | P | H |
| Nassella melanosperma (J.Presl) Barkworth | 5 | N | P | H |
| Nassella neesiana (Trin. & Rupr.) Barkworth | 1, 4, 5 | N | P | H |
| Nassella philippii (Steud.) Barkworth | 1, 5 | N | P | H |
| Nectandra angustifolia (Schrad.) Nees & Mart. | 1 | N | P | T |
| Neltuma alba (Griseb.) C.E.Hughes & G.P.Lewis | 3, 5 | N | P | T |
| Neltuma caldenia (Burkart) C.E.Hughes & G.P.Lewis | 2 | N | P | T |
| Nephrolepis cordifolia (L.) C.Presl | 1 | N | P | H |
| Nicandra physalodes (L.) Gaertn. | 5 | N | A | H |
| Nicotiana glauca Graham | 1, 3, 5 | N | P | Sh |
| Nicotiana longiflora Cav. | 1, 3, 5 | N | P | H |
| Nierembergia aristata D.Don | 1, 3, 4, 5 | N | P | H |
| Nierembergia calycina Hook. | 1 | N | P | H |
| Nierembergia rivularis Miers | 1, 5 | N | P | H |
| Nothoscordum gracile (Aiton) Stearn | 1, 5 | N | P | H |
| Nothoscordum nudicaule (Lehm.) Guagl. | 5 | N | P | H |
| Noticastrum diffusum (Pers.) Cabrera | 3, 4, 5 | N | P | C |
| Noticastrum sericeum (Less.) Phil. | 4, 5 | N | P | H |
| Nymphaea pedersenii (Wiersema) C.T.Lima & Giul. | 1 | N | P | H |
| Nymphoides humboldtiana (Kunth) Kuntze | 3 | N | P | H |
| Ocotea acutifolia (Nees) Mez | 1, 5 | N | P | T |
| Oenothera affinis Cambess. | 1, 3, 5 | N | A | H |
| Oenothera indecora Cambess. | 1, 5 | N | A | H |
| Oenothera mollissima L. | 5 | N | A | H |
| Oenothera rosea L'Hér. ex Aiton | 3 | E | P | H |
| Oldenlandia salzmannii (DC.) Benth. & Hook.f. ex B.D.Jacks. | 1, 5 | N | A | H |
| Oplismenopsis najada (Hack. & Arechav.) Parodi | 1 | N | P | H |
| Oplismenus hirtellus (L.) P.Beauv. | 5 | N | P | H |
| Opuntia elata Link & Otto ex Salm-Dyck | 1, 5 | N | P | Sh |
| Opuntia ficus-indica (L.) Mill. | 1 | E | P | Sh |
| Opuntia megapotamica Arechav. | 1, 2 | N | P | Sh |
| Opuntia sulphurea G.Don ex Salm-Dyck | 5 | N | P | Sh |
| Orthosia virgata (Poir.) E.Fourn. | 1, 5 | N | P | C |
| Osmunda spectabilis Willd. | 1 | N | P | H |
| Oxalis articulata Savigny | 1, 3, 5 | N | P | H |
| Oxalis conorrhiza Jacq. | 3 | N | P | H |
| Oxalis debilis Kunth | 1 | N | P | H |
| Oxalis pes-caprae L. | 5 | E | P | H |
| Oxalis sellowiana Zucc. | 1 | N | P | H |
| Oxybasis macrosperma (Hook.f.) S.Fuentes, Uotila & Borsch | 3, 4, 5 | N | A | H |
| Oxypetalum solanoides Hook. & Arn. | 1, 3, 4, 5 | N | P | H |
| Oxypetalum sylvestre (Hook. & Arn.) Goyder & Rapini | 1 | N | P | C |
| Panicum bergii Arechav. | 5 | N | P | H |
| Panicum dichotomiflorum Michx. | 1 | N | A | H |
| Panicum gouinii E.Fourn. | 3, 5 | N | P | H |
| Panicum miliaceum L. | 5 | E | A | H |
| Panicum racemosum (P.Beauv.) Spreng. | 5 | N | P | H |
| Panicum urvilleanum Kunth | 4 | N | P | H |
| Parapholis incurva (L.) C.E.Hubb. | 5 | E | A | H |
| Parentucellia viscosa (L.) Caruel | 5 | E | A | H |
| Parietaria debilis G.Forst. | 3 | E | A | H |
| Parkinsonia aculeata L. | 1, 3, 4, 5 | N | P | T |
| Parodiophyllochloa missiona (Ekman) Zuloaga & Morrone | 1 | N | P | H |
| Paronychia brasiliana DC. | 4 | N | P | H |
| Paronychia chilensis DC. | 1 | N | P | H |
| Pascalia glauca Ortega | 1, 3, 5 | N | P | H |
| Paspalum denticulatum Trin. | 1 | N | P | H |
| Paspalum dilatatum Poir. | 3, 5 | N | P | H |
| Paspalum distichum L. | 1, 3 | N | P | H |
| Paspalum exaltatum J.Presl | 1 | N | P | H |
| Paspalum haumanii Parodi | 1, 5 | N | P | H |
| Paspalum notatum Flüggé | 1, 3 | N | P | H |
| Paspalum quadrifarium Lam. | 3, 5 | N | P | H |
| Paspalum repens P.J.Bergius | 1, 5 | N | P | H |
| Paspalum urvillei Steud. | 5 | N | P | H |
| Paspalum vaginatum Sw. | 3, 5 | N | P | H |
| Passiflora caerulea L. | 1, 3, 5 | N | P | C |
| Passiflora misera Kunth | 1 | N | P | C |
| Passiflora morifolia Mast. | 5 | N | P | C |
| Pavonia betonicifolia C.Presl | 1, 5 | N | P | Sh |
| Pavonia hastata Cav. | 1, 5 | N | P | Sh |
| Pavonia sepium A.St.-Hil. | 1, 3, 5 | N | P | Sh |
| Pelexia bonariensis (Lindl.) Schltr. | 1, 3 | N | P | H |
| Peltophorum dubium (Spreng.) Taub. | 1 | N | P | T |
| Peperomia catharinae Miq. | 1 | N | P | H |
| Peperomia comarapana C.DC. | 1 | N | P | H |
| Persicaria acuminata (Kunth) M.Gómez | 1, 5 | N | P | H |
| Persicaria ferruginea (Wedd.) Soják | 1 | N | P | H |
| Persicaria glabra (Willd.) M.Gómez | 1 | E | P | H |
| Persicaria hydropiperoides (Michx.) Small | 1, 3, 4, 5 | N | P | H |
| Persicaria lapathifolia (L.) Delarbre | 5 | E | P | H |
| Persicaria meisneriana (Cham. & Schltdl.) M.Gómez | 1 | N | P | H |
| Persicaria punctata (Elliott) Small | 1, 5 | N | A | H |
| Persicaria setacea (Baldwin) Small | 5 | N | P | H |
| Persicaria stelligera (Cham.) Galasso | 1, 5 | N | P | H |
| Petroselinum crispum (Mill.) Fuss | 5 | E | A | H |
| Petunia axillaris (Lam.) Britton, Sterns & Poggenb. | 1, 5 | N | A | H |
| Pfaffia glomerata (Spreng.) Pedersen | 1, 5 | N | P | H |
| Phalaris angusta Nees ex Trin. | 1, 3 | N | A | H |
| Phalaris canariensis L. | 3 | E | A | H |
| Philibertia gilliesii Hook. & Arn. | 5 | N | P | C |
| Philodendron undulatum Engl. | 1, 5 | N | P | H |
| Phleum pratense L. | 4 | E | P | H |
| Phoenix canariensis H.Wildpret | 1, 3 | E | P | P |
| Phonus lanatus (L.) Hill | 5 | E | A | H |
| Phragmites australis (Cav.) Trin. ex Steud. | 5 | E | P | H |
| Phyla nodiflora (L.) Greene | 1, 3, 4, 5 | N | P | Sh |
| Phyllanthus niruri L. | 5 | N | A | H |
| Phyllanthus sellowianus (Klotzsch) Müll.Arg. | 5 | N | P | Sh |
| Physalis angulata L. | 3 | N | A | H |
| Physalis viscosa L. | 1, 3, 5 | N | P | H |
| Phytolacca americana L. | 1, 5 | E | P | Sh |
| Phytolacca dioica L. | 1, 3, 5 | N | P | T |
| Phytolacca tetramera Hauman | 3, 5 | N | P | Sh |
| Picrosia longifolia D.Don | 1, 5 | N | P | H |
| Piptochaetium bicolor (Vahl) É.Desv. | 3 | N | P | H |
| Piptochaetium medium (Speg.) Torres | 1, 3 | N | P | H |
| Piptochaetium stipoides (Trin. & Rupr.) Hack. ex Arechav. | 1, 4 | N | P | H |
| Pistia stratiotes L. | 1, 3, 5 | N | P | H |
| Pityrogramma trifoliata (L.) R.M.Tryon | 1 | N | P | H |
| Plantago australis Lam. | 1, 3, 5 | N | P | H |
| Plantago heterophylla Nutt. | 3, 5 | N | A | H |
| Plantago lanceolata L. | 3, 5 | E | P | H |
| Plantago major L. | 1, 5 | E | P | H |
| Plantago myosuros Lam. | 1, 3 | N | A | H |
| Plantago patagonica Jacq. | 4 | N | A | H |
| Pleopeltis minima (Bory) J.Prado & R.Y.Hirai | 1 | N | P | H |
| Pleopeltis pleopeltifolia (Raddi) Alston | 5 | N | P | H |
| Pluchea sagittalis (Lam.) Cabrera | 1, 3, 4, 5 | N | P | H |
| Poa annua L. | 3 | E | A | H |
| Poa bergii Hieron. | 5 | N | P | H |
| Poa bonariensis (Lam.) Kunth | 1, 5 | N | P | H |
| Poa iridifolia Hauman | 3 | N | P | H |
| Poa lanigera Nees | 1 | N | P | H |
| Poa lanuginosa Poir. | 3 | N | P | H |
| Poa ligularis Nees ex Steud. | 1 | N | P | H |
| Podocoma hieraciifolia (Poir.) Cass. | 4 | N | P | H |
| Podocoma hirsuta Baker | 5 | N | P | H |
| Podranea ricasoliana (Tanfani) Sprague | 5 | E | P | C |
| Poikilacanthus glandulosus (Nees) Ariza | 1 | N | P | Sh |
| Poikilacanthus tweedieanus (Nees) Lindau | 3 | N | P | Sh |
| Polygonum aviculare L. | 1, 5 | E | A | H |
| Polygonum brasiliense K.Koch | 1, 3 | N | P | H |
| Polypogon chilensis (Kunth) Pilg. | 5 | N | A | H |
| Polypogon elongatus Kunth | 1, 5 | N | P | H |
| Polypogon imberbis (Phil.) Johow |  | N | P | H |
| Polypogon monspeliensis (L.) Desf. | 1, 3, 4 | E | A | H |
| Pombalia parviflora (L.f.) Paula-Souza | 5 | N | P | Sh |
| Pontederia azurea Sw. | 1, 5 | N | P | H |
| Pontederia cordata L. | 1, 5 | N | P | H |
| Pontederia crassipes Mart. | 1, 3, 5 | N | P | H |
| Pontederia rotundifolia L.f. | 1, 5 | N | P | H |
| Porlieria microphylla (Baill.) Descole, O'Donell & Lourteig | 1 | N | P | Sh |
| Portulaca oleracea L. | 3, 5 | E | A | H |
| Potamogeton polygonus Cham. | 1 | N | P | H |
| Potentilla indica (Andrews) Th.Wolf | 1, 3, 5 | E | P | H |
| Prunella vulgaris L. | 1 | E | P | H |
| Pseudalbizzia inundata (Mart.) E.J.M. Koenen & Duno | 1 | N | P | T |
| Pseudognaphalium cheiranthifolium (Lam.) Hilliard & B.L.Burtt | 4 | N | P | H |
| Pseudognaphalium gaudichaudianum (DC.) Anderb. | 4 | N | P | H |
| Pseudognaphalium leucopeplum (Cabrera) Anderb. | 5 | N | P | H |
| Psidium guajava L. | 1 | N | P | Sh |
| Pteris multifida Poir. | 1 | E | P | H |
| Pteris tremula R.Br. | 1 | E | P | H |
| Pteris vittata L. | 5 | E | P | H |
| Pterocaulon balansae Chodat | 1 | N | P | H |
| Pterocaulon cordobense Kuntze | 3, 4, 5 | N | P | H |
| Pterocaulon virgatum (L.) DC. | 1 | N | A | H |
| Pyracantha coccinea M.Roem. | 1 | E | P | Sh |
| Quercus robur L. | 1 | E | P | T |
| Ranunculus apiifolius Pers. | 1, 3, 4, 5 | N | A | H |
| Ranunculus bonariensis Poir. | 5 | N | A | H |
| Ranunculus flagelliformis Sm. | 5 | N | A | H |
| Ranunculus muricatus L. | 1, 5 | E | A | H |
| Ranunculus platensis Spreng. | 5 | N | A | H |
| Ranunculus repens L. | 1, 5 | E | P | H |
| Raphanus raphanistrum L. | 1, 5 | E | A | H |
| Rapistrum rugosum (L.) All. | 1, 3, 5 | E | A | H |
| Raulinoreitzia tremula (Hook. & Arn.) R.M.King & H.Rob. | 1, 5 | N | P | Sh |
| Rhabdocaulon strictum (Benth.) Epling | 1 | N | P | H |
| Rhynchosia bicentrica B.L.Turner | 4 | N | P | H |
| Rhynchosida physocalyx (A.Gray) Fryxell | 1, 4 | N | P | H |
| Rhynchospora asperula (Nees) Steud. | 3 | N | P | H |
| Rhynchospora corymbosa (L.) Britton | 1, 5 | N | P | H |
| Rhynchospora scutellata Griseb. | 1 | N | P | H |
| Ricinus communis L. | 1, 3, 5 | E | P | Sh |
| Rivina humilis L. | 1, 3, 5 | N | P | H |
| Rorippa dubia (Pers.) H.Hara | 1 | E | A | H |
| Rorippa palustris (L.) Besser | 1 | E | A | H |
| Rubus ulmifolius Schott | 1 | E | P | Sh |
| Ruellia simplex C.Wright | 1, 5 | N | P | H |
| Rumex crispus L. | 5 | E | P | H |
| Rumex paraguayensis D.Parodi | 4 | N | A | H |
| Sagittaria montevidensis Cham. & Schltdl. | 1, 3, 4, 5 | N | P | H |
| Salicornia ambigua Michx. | 5 | E | P | Sh |
| Salicornia neei Lag. | 1, 3, 4, 5 | N | P | Sh |
| Salix humboldtiana Willd. | 1, 3, 5 | N | P | T |
| Salpichroa origanifolia (Lam.) Baill. | 1, 3, 4, 5 | N | P | H |
| Salvia guaranitica A.St.-Hil. ex Benth. | 1, 3, 5 | N | P | H |
| Salvia microphylla Kunth | 1 | E | P | Sh |
| Salvia pallida Benth. | 1, 3 | N | P | H |
| Salvia procurrens Benth. | 1, 5 | N | P | H |
| Salvia uliginosa Benth. | 1, 5 | N | P | H |
| Salvinia biloba Raddi | 1 | N | P | H |
| Sambucus australis Cham. & Schltdl. | 1, 3, 5 | N | P | Sh |
| Samolus valerandi L. | 5 | N | P | H |
| Sapium haematospermum Müll.Arg. | 1, 3, 5 | N | P | T |
| Schaefferia argentinensis Speg. | 1, 3 | N | P | Sh |
| Schinus fasciculata (Griseb.) I.M.Johnst. | 1 | N | P | Sh |
| Schinus longifolia (Lindl.) Speg. | 1, 4, 5 | N | P | T |
| Schinus molle L. | 1, 3 | N | P | T |
| Schismus arabicus Nees | 5 | E | A | H |
| Schizachyrium condensatum (Kunth) Nees | 3 | N | P | H |
| Schoenoplectus americanus (Pers.) Volkart | 3, 5 | N | P | H |
| Schoenoplectus californicus (C.A.Mey.) Soják | 1, 3, 4, 5 | N | P | H |
| Schoenoplectus pungens (Vahl) Palla | 3, 5 | N | P | H |
| Sclerophylax spinescens Miers | 1 | N | A | H |
| Scoparia montevidensis (Spreng.) R.E.Fr. | 1 | N | P | H |
| Scutellaria platensis Speg. | 1 | N | P | H |
| Scutellaria racemosa Pers. | 1, 5 | N | P | H |
| Scutia buxifolia Reissek | 5 | N | P | T |
| Sebastiania klotzschiana (Müll.Arg.) Müll.Arg. | 1, 5 | N | P | T |
| Selaginella muscosa Spring | 5 | N | P | H |
| Selaginella sulcata (Desv.) Spring ex Mart. | 3 | N | P | H |
| Senecio angulatus L.f. | 1, 3, 5 | E | P | C |
| Senecio arechavaletae Baker | 3 | N | P | H |
| Senecio bergii Hieron. | 5 | N | P | Sh |
| Senecio bonariensis Hook. & Arn. | 1, 3, 5 | N | P | H |
| Senecio brasiliensis (Spreng.) Less. | 1, 3, 5 | N | P | H |
| Senecio crassiflorus (Poir.) DC. | 3, 5 | N | P | H |
| Senecio grisebachii Baker | 1 | N | P | H |
| Senecio madagascariensis Poir. | 1, 3, 5 | E | P | H |
| Senecio montevidensis (Spreng.) Baker | 4, 5 | N | P | H |
| Senecio pampeanus Cabrera | 4 | N | P | H |
| Senecio pterophorus DC. | 1, 3, 5 | N | P | H |
| Senecio pulcher Hook. & Arn. | 3 | N | P | H |
| Senecio selloi DC. | 1, 3, 5 | N | P | Sh |
| Senecio tweediei Hook. & Arn. | 1, 3, 4, 5 | N | A | H |
| Senega cyparissias (A.St.-Hil. & Moq.) J.F.B.Pastore & Agust.Martinez | 3 | N | P | H |
| Senna corymbosa (Lam.) H.S.Irwin & Barneby | 1, 3, 5 | N | P | Sh |
| Senna pendula (Humb. & Bonpl. ex Willd.) H.S.Irwin & Barneby | 1 | N | P | Sh |
| Serjania meridionalis Cambess. | 5 | N | P | C |
| Sesbania punicea (Cav.) Benth. | 1, 5 | N | P | T |
| Sesbania virgata (Cav.) Poir. | 1, 3, 5 | N | P | Sh |
| Sesuvium portulacastrum (L.) L. | 1, 3, 4, 5 | N | P | H |
| Setaria lachnea (Nees) Kunth | 1 | N | P | H |
| Setaria pampeana Parodi ex Nicora | 1 | N | P | H |
| Setaria parviflora (Poir.) Kerguélen | 1, 4 | N | P | H |
| Setaria sphacelata (Schumach.) Stapf & C.E.Hubb. ex Moss | 1 | E | P | H |
| Setaria verticillata (L.) P.Beauv. | 5 | E | A | H |
| Sida rhombifolia L. | 1, 3, 5 | N | P | Sh |
| Sida spinosa L. | 1, 3 | N | P | Sh |
| Silene antirrhina L. | 5 | E | A | H |
| Silene gallica L. | 3, 5 | E | A | H |
| Silybum marianum (L.) Gaertn. | 5 | E | A | H |
| Sisymbrium officinale (L.) Scop. | 1, 4 | E | A | H |
| Sisyrinchium chilense Hook. | 3 | N | P | H |
| Sisyrinchium micranthum Cav. | 1, 5 | N | P | H |
| Sisyrinchium platense I.M.Johnst. | 1, 3, 5 | N | P | H |
| Smallanthus connatus (Spreng.) H.Rob. | 5 | N | P | H |
| Smilax campestris Griseb. | 1 | N | P | C |
| Soehrensia candicans (Gillies ex Salm-Dyck) Schlumpb. | 5 | N | P | Sh |
| Solanum americanum Mill. | 1, 5 | N | P | H |
| Solanum amygdalifolium Steud. | 1, 3, 5 | N | P | Sh |
| Solanum betaceum Cav. | 5 | N | P | T |
| Solanum bonariense L. | 1, 5 | N | P | Sh |
| Solanum chacoense Bitter | 3, 5 | N | P | H |
| Solanum chenopodioides Lam. | 1, 3, 5 | N | A | H |
| Solanum commersonii Poir. | 1, 3, 5 | N | P | H |
| Solanum elaeagnifolium Cav. | 3, 5 | N | P | H |
| Solanum glaucophyllum Desf. | 1, 3, 4, 5 | N | P | Sh |
| Solanum granulosoleprosum Dunal | 1, 3, 5 | N | P | T |
| Solanum laxum Spreng. | 1, 3, 5 | N | P | H |
| Solanum mauritianum Scop. | 1 | N | P | Sh |
| Solanum pilcomayense Morong | 1 | N | P | H |
| Solanum pseudocapsicum L. | 1, 3, 5 | N | P | Sh |
| Solanum pygmaeum Cav. | 5 | N | P | H |
| Solanum radicans L.f. | 3 | N | P | Sh |
| Solanum sarrachoides Sendtn. | 1, 3, 5 | N | A | H |
| Solidago chilensis Meyen | 1, 3, 4, 5 | N | P | H |
| Soliva anthemifolia (Juss.) Sweet | 1 | N | A | H |
| Soliva sessilis Ruiz & Pav. | 1, 3 | N | A | H |
| Sommerfeltia spinulosa Less. | 5 | N | P | H |
| Sonchus asper (L.) Hill | 1 | E | A | H |
| Sonchus oleraceus L. | 1, 3, 5 | E | A | H |
| Sorghum halepense (L.) Pers. | 1, 3 | E | P | H |
| Spartium junceum L. | 3, 5 | E | P | Sh |
| Spergularia levis Cambess. | 1, 5 | N | P | H |
| Spergularia marina (L.) Besser | 5 | E | A | H |
| Spergularia media (L.) C.Presl | 5 | E | P | H |
| Spergularia platensis (Cambess.) Fenzl | 1, 3 | N | A | H |
| Spergularia ramosa Cambess. | 3 | N | P | H |
| Spergularia villosa (Pers.) Cambess. | 1, 3 | N | P | H |
| Spermacoce verticillata L. | 1 | N | P | Sh |
| Sphaeralcea bonariensis (Cav.) Griseb. | 1, 3, 5 | N | P | Sh |
| Sphaeralcea mendocina Phil. | 5 | N | P | Sh |
| Sphaeralcea purpurata (Lindl.) Krapov. | 3 | N | P | H |
| Spigelia humboldtiana Cham. & Schltdl. | 5 | N | P | H |
| Sporobolus alterniflorus (Loisel.) P.M.Peterson & Saarela | 5 | N | P | H |
| Sporobolus coarctatus (Trin.) P.M.Peterson & Saarela | 3, 5 | N | P | H |
| Sporobolus indicus (L.) R.Br. | 1, 3, 5 | N | P | H |
| Sporobolus longispicus (Hauman & Parodi ex St.-Yves) P.M.Peterson & Saarela | 5 | N | P | H |
| Sporobolus montevidensis (Arechav.) P.M.Peterson & Saarela | 5 | N | P | H |
| Sporobolus pyramidatus (Lam.) Hitchc. | 1, 5 | N | P | H |
| Stachys arvensis (L.) L. | 1 | E | A | H |
| Stachys gilliesii Benth. | 5 | N | P | H |
| Stapfochloa canterae (Arechav.) P.M.Peterson | 4 | N | P | H |
| Steinchisma decipiens (Nees ex Trin.) W.V.Br. | 5 | N | P | H |
| Steinchisma spathellosum (Döll) Renvoize | 5 | N | P | H |
| Stellaria media (L.) Vill. | 1, 3, 5 | E | A | H |
| Stemodia lanceolata Benth. | 1, 4 | N | P | H |
| Stemodia lobelioides Lehm. | 1, 5 | N | P | H |
| Stenandrium dulce (Cav.) Nees | 4 | N | P | H |
| Stenotaphrum secundatum (Walter) Kuntze | 5 | N | P | H |
| Stevia aristata D.Don ex Hook. & Arn. | 1 | N | P | H |
| Stevia multiaristata Spreng. | 1 | N | P | Sh |
| Stevia satureiifolia (Lam.) Cav. | 5 | N | P | Sh |
| Stigmaphyllon bonariense (Hook. & Arn.) C.E.Anderson | 1, 5 | N | P | C |
| Stuckenia pectinata (L.) Börner | 3 | N | P | H |
| Suaeda patagonica Speg. | 4, 5 | N | A | H |
| Syagrus romanzoffiana (Cham.) Glassman | 1 | N | P | P |
| Symphyotrichum squamatum (Spreng.) G.L.Nesom | 1, 3, 4, 5 | N | P | H |
| Symplocos uniflora (Pohl) Benth. | 1 | N | P | T |
| Tagetes minuta L. | 1, 3, 5 | N | A | H |
| Talinum paniculatum (Jacq.) Gaertn. | 1, 3, 5 | E | P | H |
| Tamarix gallica L. | 5 | E | P | Sh |
| Tanacetum vulgare L. | 5 | E | P | H |
| Taraxacum officinale F.H. Wigg. | 1, 3, 4, 5 | E | P | H |
| Taxodium distichum (L.) Rich. | 1, 4, 5 | E | P | T |
| Tecoma stans (L.) Juss. ex Kunth | 5 | N | P | T |
| Terminalia australis Cambess. | 1, 5 | N | P | T |
| Tessaria absinthioides (Hook. & Arn.) DC. | 2, 3, 5 | N | P | Sh |
| Tessaria integrifolia Ruiz & Pav. | 1, 3, 5 | N | P | T |
| Teucrium cubense Jacq. | 1, 3, 5 | N | P | H |
| Teucrium vesicarium Mill. | 1, 3, 5 | N | P | H |
| Thalia geniculata L. | 1, 5 | N | P | H |
| Thalia multiflora Horkel ex Körn. | 3 | N | P | H |
| Thelypteris abbiattii C.F.Reed | 5 | N | P | H |
| Thelypteris confluens (Thunb.) C.V.Morton | 3 | E | P | H |
| Thelypteris interrupta (Willd.) K.Iwats. | 1, 5 | N | P | H |
| Thinopyrum obtusiflorum (DC.) Banfi | 4 | E | P | H |
| Tillandsia aeranthos (Loisel.) Desf. | 1, 3, 5 | N | P | H |
| Tillandsia bandensis Baker | 1 | N | P | H |
| Tillandsia pedicellata (Mez) A.Cast. | 5 | N | P | H |
| Tillandsia recurvata (L.) L. | 1, 3, 5 | N | P | H |
| Tillandsia usneoides (L.) L. | 1, 5 | N | P | H |
| Tipuana tipu (Benth.) Kuntze | 1 | N | P | T |
| Torilis nodosa (L.) Gaertn. | 1, 4, 5 | E | A | H |
| Tradescantia fluminensis Vell. | 3, 5 | N | P | H |
| Tradescantia pallida (Rose) D.R.Hunt | 3 | N | P | H |
| Tragia geraniifolia Klotzsch ex Müll.Arg. | 3, 4 | N | P | H |
| Tragia volubilis L. | 5 | N | P | C |
| Tribulus terrestris L. | 1 | E | A | H |
| Trichocline sinuata (D.Don) Cabrera | 3 | N | P | H |
| Trifolium dubium Sibth. | 1 | E | A | H |
| Trifolium fragiferum L. | 3 | E | P | H |
| Trifolium pratense L. | 1, 3, 5 | E | P | H |
| Trifolium repens L. | 1, 3, 4, 5 | E | P | H |
| Triodanis perfoliata (L.) Nieuwl. | 1 | N | A | H |
| Tripogandra diuretica (Mart.) Handlos | 1, 5 | N | P | H |
| Trixis nobilis (Vell.) Katinas | 1 | N | P | Sh |
| Trixis praestans (Vell.) Cabrera | 1 | N | P | Sh |
| Tropaeolum majus L. | 1, 5 | E | P | H |
| Tropaeolum pentaphyllum Lam. | 1, 5 | N | P | C |
| Turnera sidoides L. | 1 | N | P | H |
| Typha domingensis Pers. | 1, 3 | N | P | H |
| Typha latifolia L. | 1, 3 | E | P | H |
| Ulex europaeus L. | 3 | E | P | Sh |
| Urolepis hecatantha (DC.) R.M.King & H.Rob. | 1, 3, 5 | N | A | H |
| Urtica urens L. | 3, 5 | E | A | H |
| Urvillea uniloba Radlk. | 5 | N | P | C |
| Vachellia caven (Molina) Seigler & Ebinger | 1, 3, 4, 5 | N | P | T |
| Valeriana polystachya Sm. | 5 | N | P | H |
| Valeriana salicariifolia Vahl | 1 | N | P | H |
| Varronia dichotoma Ruiz & Pav. | 1, 5 | N | P | Sh |
| Verbascum thapsus L. | 4 | E | A | H |
| Verbascum virgatum Stokes | 1, 5 | E | A | H |
| Verbena bonariensis L. | 1, 3, 4, 5 | N | P | H |
| Verbena gracilescens (Cham.) Herter | 1, 4 | N | P | H |
| Verbena incompta P.W.Michael | 1 | N | A | H |
| Verbena intermedia Gillies & Hook. | 3, 4, 5 | N | P | H |
| Verbena litoralis Kunth | 1, 3, 4, 5 | N | P | H |
| Verbena montevidensis Spreng. | 1, 5 | N | P | H |
| Verbesina encelioides (Cav.) Benth. & Hook.f. ex A.Gray | 2, 5 | N | A | H |
| Verbesina subcordata DC. | 5 | N | P | Sh |
| Vernonia echioides Less. | 5 | N | P | H |
| Vernonia incana Less. | 1 | N | P | H |
| Veronica anagallis-aquatica L. | 3, 5 | E | A | H |
| Veronica arvensis L. | 5 | E | A | H |
| Veronica peregrina L. | 1, 3 | E | A | H |
| Veronica persica Poir. | 1, 5 | E | A | H |
| Veronica polita Fr. | 5 | E | A | H |
| Vicia epetiolaris Burkart | 1, 3 | N | A | C |
| Vicia graminea Sm. | 1 | N | A | H |
| Vicia sativa L. | 1, 3, 5 | E | A | H |
| Vigna luteola (Jacq.) Benth. | 1, 5 | N | A | C |
| Vinca major L. | 5 | E | P | H |
| Viola odorata L. | 3, 5 | E | P | H |
| Visnaga daucoides Gaertn. | 1, 3 | E | A | H |
| Wedelia montevidensis (Spreng.) B.L.Turner | 5 | N | P | H |
| Wedelia silphioides (Hook. & Arn.) B.L.Turner | 1, 5 | N | P | H |
| Wisteria sinensis (Sims) DC. | 1, 5 | E | P | C |
| Xanthium orientale L. | 1 | N | A | H |
| Xanthium spinosum L. | 3 | N | A | H |
| Xanthium strumarium L. | 3, 5 | N | A | H |
| Youngia japonica (L.) DC. | 1, 5 | E | A | H |
| Yucca gloriosa L. | 3, 4 | E | P | Sh |
| Zephyranthes bifida (Herb.) Nic.García & Meerow | 3, 5 | N | P | H |
| Zephyranthes candida Herb. | 1, 3, 5 | N | P | H |
| Zephyranthes gracilifolia (Herb.) G.Nicholson | 5 | N | P | H |
| Zephyranthes minima Herb. | 1, 5 | N | P | H |
| Zephyranthes tubispatha (L'Hér.) Herb. | 3 | N | P | H |
| Zizaniopsis bonariensis (Balansa & Poitr.) Speg. | 1, 5 | N | P | H |
| Zornia trachycarpa Vogel | 4 | N | P | H |

**Tab. S2** Total number of native and exotic species recorded per period in the study area.

| **Period** | **Native** | **Exotic** | **Total** |
| --- | --- | --- | --- |
| 1 | 216 | 39 | 255 |
| 2 | 237 | 58 | 295 |
| 3 | 569 | 191 | 760 |
| Total per origin | 747 | 239 | 986 |

**Tab. S3** Wetland Conservation Index (CI) values for each wetland region by study periods (CI1, CI2, CI3) and for the entire database (CI total).

| **Region** | **CI1** | **CI2** | **CI3** | **CITotal** |
| --- | --- | --- | --- | --- |
| **1 - Wetlands of the Chaco-Mesopotamian river corridor** | 0.73 | **0.69** | **0.58** | **0.58** |
| **2- Wetlands of the Central Monte** | 1 | 0 | 0.80 | 0.82 |
| **3 - Wetlands of the Pampas** | **0.47** | 0.48 | 0.40 | **0.44** |
| **4 - Wetlands of the Pampas, Brackish Lagoons of the interior Pampas** | **0.91** | **0.27** | **0.29** | 0.50 |
| **5 - Coastal wetlands** | 0.58 | 0.66 | 0.52 | 0.53 |
